# Supplementary material
Source: publisher site journal article supplement (https://www.spandidos-publications.com/2839/downloadSupplementary)
Supplement: Supplementary file 1 [file downloadSupplementary]

## Sheet: Table SI
				Table SI. Clinicopathological features and outcomes of the 14 PNET cases.
编号	送检日期	主诊医生	送检科室	Patient ID	Gender	Age	Diabetics	Sample_ID	Tumor location	UICC classification	WHO classification	Lymph node metastasis	Liver metastasis	Neural invasion	KI-67	Follow up (months)	Status
60	2016-02-22	金钢	胰腺外科	PNET-1	Female	65	Yes, T2DM	EZ16022205LNCE	Pancreatic head	T1cN0M0	G2	No	No	No	0.03	24	Alive
62	2016-02-22	金钢	胰腺外科	PNET-2	Female	51	No	EZ16022207LNCE	Pancreatic tail	T2N0M0	G2	No	No	No	0.02	26	Alive
141	2016-06-06	金钢	胰腺外科	PNET-3	Male	49	No	EZ16060602LNCT	Pancreatic tail	T3N1M0	G3	Yes	No	Yes	0.25	38	Alive
185	2016-09-05	郑楷炼	胰腺外科	PNET-4	Female	46	No	EZ16090601LNCT	Pancreatic tail	T3N1M0	G2	Yes	No	No	0.1	29	Alive
204	2016-09-29	郭世伟	胰腺外科	PNET-5	Male	52	No	EZ16092901LNCT	Pancreatic tail	T3N0M1	G2	No	Yes	No	0.05	19	Alive
226	2016-11-17	郑楷炼	胰腺外科	PNET-6	Male	42	No	EZ16111803LNCT	Pancreatic tail	T3N0M1	G2	No	Yes	Yes	0.05	15	Alive
231	2016-11-24	郑楷炼	胰腺外科	PNET-7	Male	57	No	EZ16112504LNCT	Pancreatic tail	T2N0M0	G1	No	No	Yes	0.01	22	Alive
250	2016-12-28	郑楷炼	胰腺外科	PNET-8	Male	28	No	EZ16122903LNCT	Pancreatic head	T3N1M0	G3	Yes	No	Yes	0.4	15	Dead
263	2017-02-08	邵卓	胰腺外科	PNET-9	Male	53	No	EZ17020903LNCT	Pancreatic tail	TT2N0M1	G2	No	Yes	No	0.05	21	Alive
283	2017-03-02	郭世伟	胰腺外科	PNET-10	Female	62	Yes, T2DM	EZ17030302LNCT	Pancreatic head	T2N0M0	G2	No	No	No	0.05	20	Alive
284	2017-03-02	金钢	胰腺外科	PNET-11	Female	34	No	EZ17030301LNCT	Pancreatic head	T3N1M0	G2	Yes	No	No	0.05	lost	Lost
307	2017-04-05	金钢	胰腺外科	PNET-12	Female	40	No	EZ17040602LNCT	Pancreatic tail	T2N1M0	G2	Yes	No	No	0.05	20	Alive
385	2017-07-12	金钢	胰腺外科	PNET-13	Male	56	No	EZ17081501LNCTX	Pancreatic tail	T2N1M0	G2	Yes	No	No	0.15	7	Liver Metastasis
403	2017-09-09	周颖奇	胰腺外科	PNET-14	Female	36	No	EZ17091404LNCTX	Pancreatic tail	T1cN1M1	G2	Yes	Yes	No	0.06	5	Alive
